# Supplementary material for: Bacterial-host adhesion dominated by collagen subtypes remodeled by osmotic pressures
Source: Research Square preprint supplement (doi:10.21203/rs.3.rs-4003372/v1), 2024-03-18
Supplement: Supplementary file 1 [file 08a022d4e0bba351e7ccaca6.pdf]

Supporting information for

## **Bacterial-host adhesion dominated by collagen subtypes remodeled by osmotic pressures**

Hongwei Xu,<sup>a</sup> Yuting Feng,<sup>a</sup> Yiming Han,<sup>a</sup> Xiaocen Duan,<sup>a</sup> Ying Jiang,<sup>a,b</sup> Liya Su,<sup>c</sup>  
Xiaozhi Liu,<sup>d,e</sup> Siying Qin,<sup>f</sup> and Jianyong Huang<sup>a,\*</sup>

<sup>a</sup>. Department of Mechanics and Engineering Science, College of Engineering, Peking University, Beijing 100871, China.

<sup>b</sup>. Nanchang Innovation Institute of Peking University, Nanchang 330096, China

<sup>c</sup>. Clinical Medical Research Center of the Affiliated Hospital, Inner Mongolia Medical University, Inner Mongolia Key Laboratory of Medical Cell Biology, Hohhot 010050, Inner Mongolia, China

<sup>d</sup>. Tianjin Key Laboratory of Epigenetics for Organ Development of Premature Infants, Fifth Central Hospital of Tianjin, Tianjin 300450, China.

<sup>e</sup>. High Altitude Characteristic Medical Research Institute, Huangnan Tibetan Autonomous Prefecture People's Hospital, Huangnan Prefecture, Qinghai Province 811399, China

<sup>f</sup>. School of Life Sciences, Peking University, 100871 Beijing, China

\*Correspondence should be addressed to Jianyong Huang, Email: [jyhuang@pku.edu.cn](mailto:jyhuang@pku.edu.cn)

### **This PDF file includes:**

Figs. S1 to S8

Tables S1 to S4

### **Other Supplementary Materials for this manuscript include the following:**

Movie S1

Data S1

## Supplementary Text

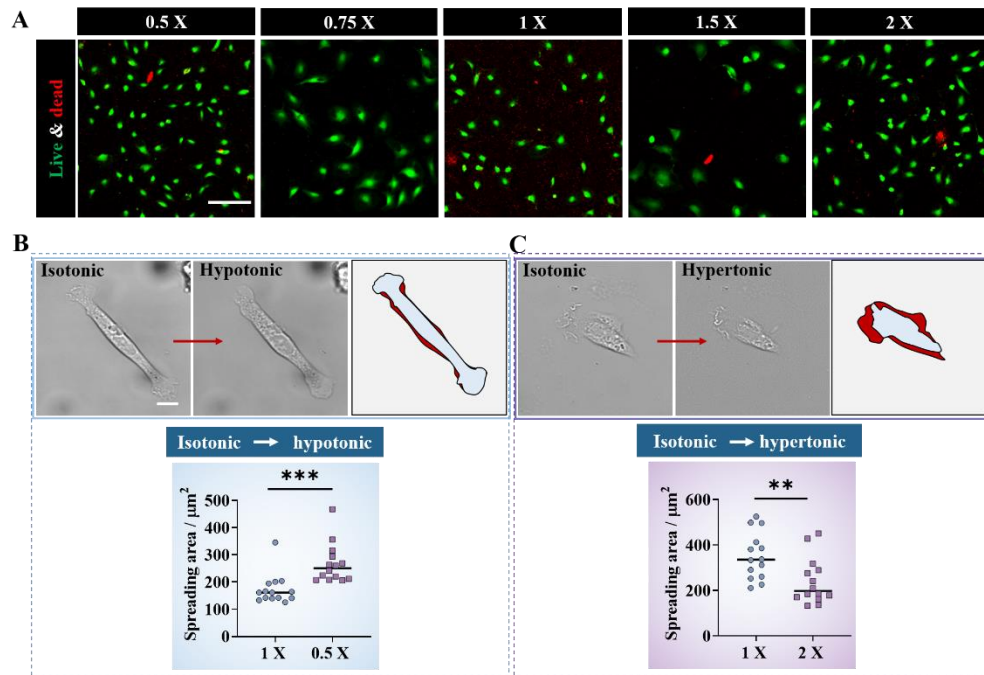

**Fig. S1.** Cytotoxicity assay and morphological changes under osmotic stresses. (A) Results of live/dead staining after IEC-6 cells were exposed to hypotonic (0.5 X and 0.75 X), isotonic (1 X), and hypertonic (1.5 X and 2 X) solutions for 3 h, where green denoted the live cells whereas red indicated the dead ones. Scale bar: 100  $\mu\text{m}$ . (B) and (C) changes in cell morphology after 3 min of hypotonic and hypertonic stimulation. The spreading areas of the cells were quantified via the software of ImageJ. Scale bar: 10  $\mu\text{m}$ . At least three independent experiments were carried out for each condition. Two-sided unpaired t test was used for statistical analysis. \*\*and\*\*\* indicated  $P < 0.01$  and  $P < 0.001$ , respectively.

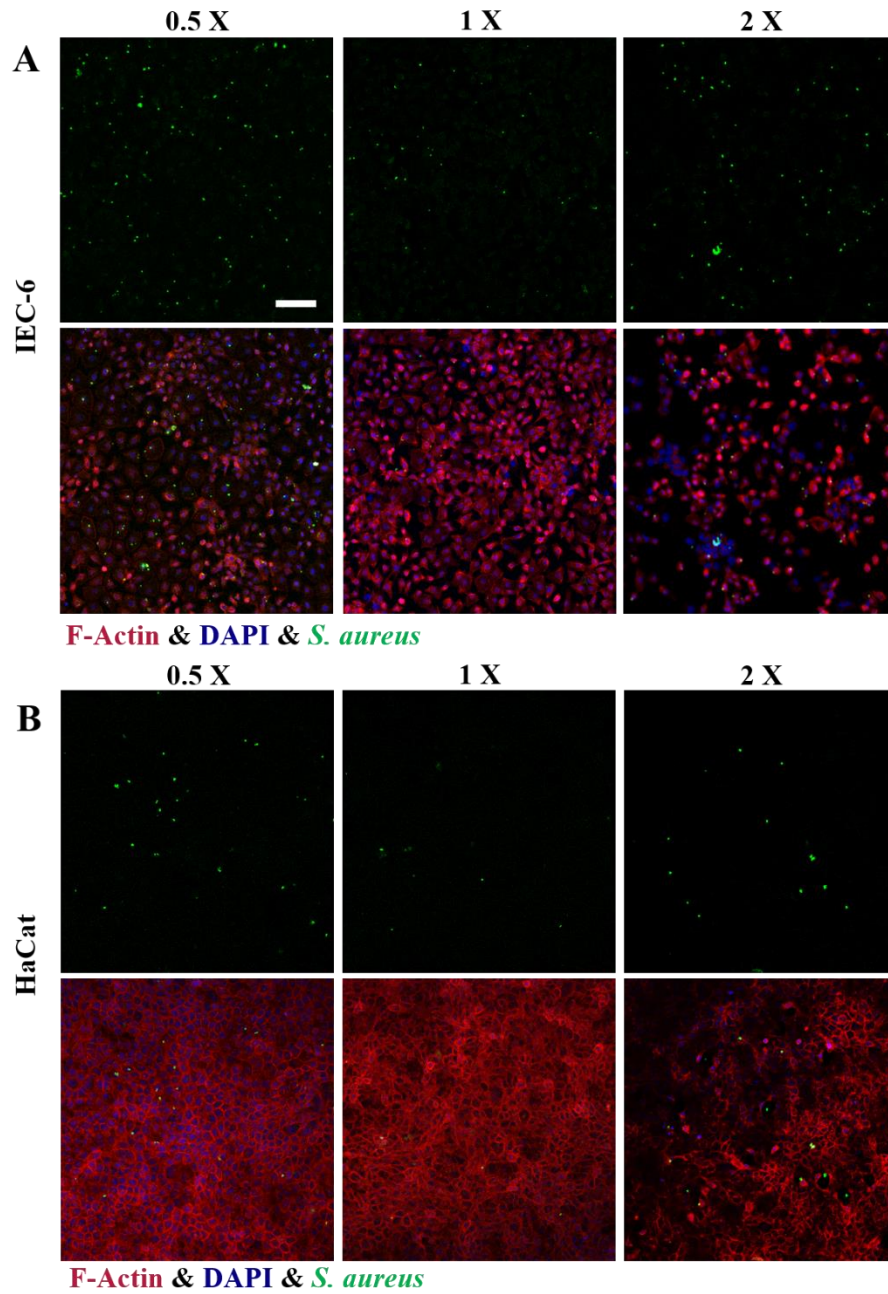

**Fig. S2.** Interactions between *Staphylococcus aureus* (*S. aureus*) expressing green fluorescent protein (GFP) and host cell monolayers of IEC-6 (A) or HaCat cell (B). Scale bar: 50  $\mu$ m.

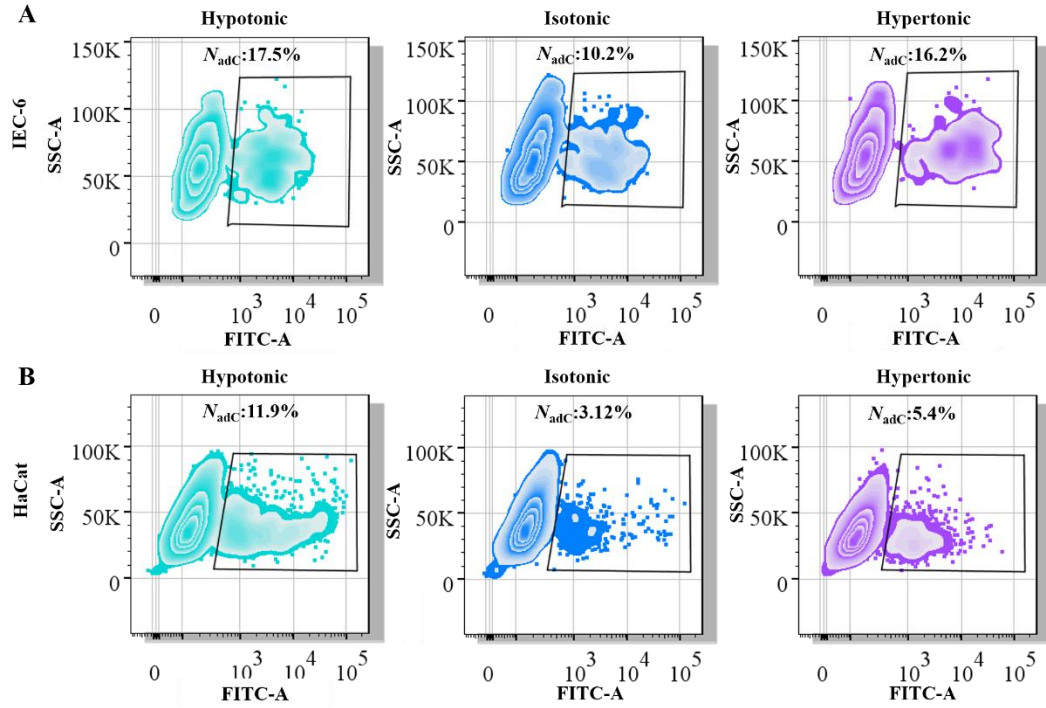

**Fig. S3.** Interactions between bacteria (*S. aureus*) and host cells including (A) IEC-6 cells and (B) HaCat cells, regulated with environmental osmotic pressures, where the host cells carrying bacteria, *i.e.*, the host cells to which bacteria adhered and internalized, were quantified through the flow cytometry. The percentages of the host cells carrying bacteria were also presented in the images.

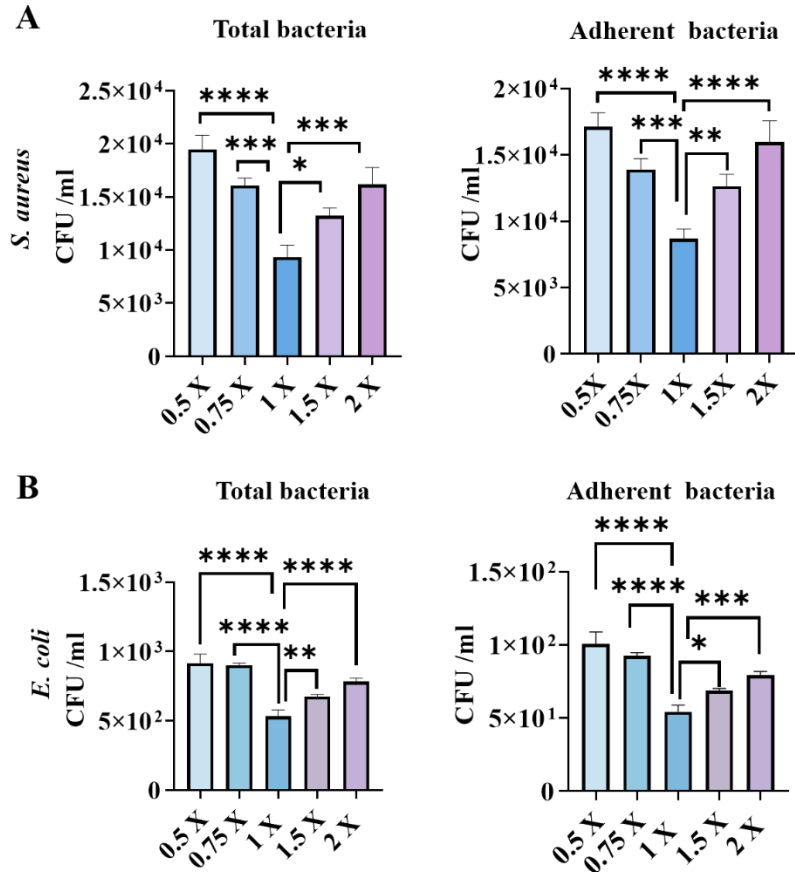

**Fig. S4.** Colony counts of bacteria that directly interacted with the host cells, including adherent bacteria and internalized bacteria (hereafter referred to as total bacteria) and purely adherent bacteria. (A) and (B) were the corresponding experimental results, in which the adopted bacteria were gram-positive bacterium *S. aureus* and gram-negative bacterium *E. coli*, respectively. In these experiments, the host cells were allowed to interact with GFP-expressing *S. aureus*. Then, they were rinsed three times with Dulbecco's phosphate buffered saline (DPBS) solution. To quantify the number of total bacteria that included adherent bacteria and internalized bacteria, the host cells harboring adherent and internalized bacteria were lysed with 1% Triton X-100 and subsequently serially diluted for analysis based on the flat colony counting method. On the other hand, the host cells were treated with 200  $\mu$ g/mL gentamicin to kill extracellularly adherent bacteria. In this way, one could determine the number of internalized bacteria. Further, the cells were lysed with 1% Triton X-100 and serially diluted for analysis using the same flat colony counting method. Finally, the purely adherent bacteria might be quantitatively estimated. At least three independent

experiments were carried out for each specific experimental condition. All the statistical data were denoted as Mean $\pm$ SD, and one-way analysis of variance (ANOVA) was employed in the data analyses with \*\* and \*\*\* indicating  $P < 0.01$  and  $P < 0.001$ , respectively.

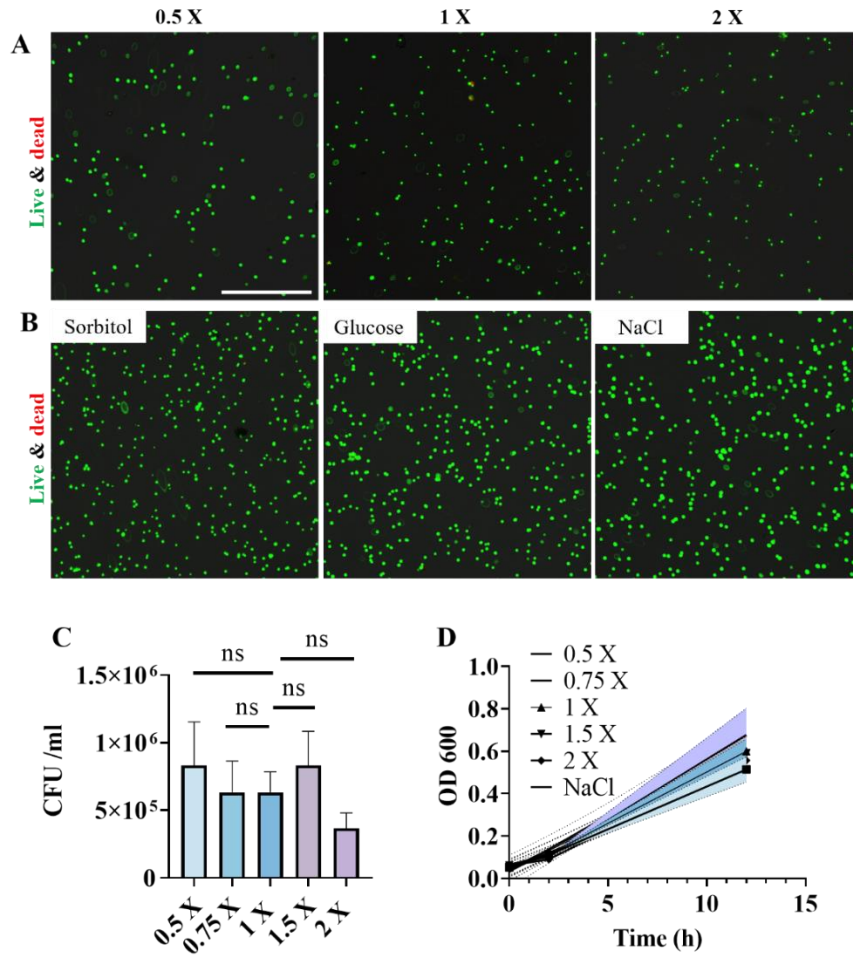

**Fig. S5.** Bacterial viability tests under different osmotic pressures. (A) Fluorescence images presenting the viability of *S. aureus*, where the live and dead bacteria were labelled as green and red by SYTO/PI dead-live double staining, respectively, after they were treated with hypotonic (0.5 X, left), isotonic (1 X, middle) and hypertonic (2 X, right) solutions for 6 h. (B) Typical fluorescence images presenting the viability of *S. aureus* after they were treated with the hypertonic solutions prepared with sorbitol (left), glucose (middle) and NaCl (right), respectively. (C) Colony count-based statistical results of the bacteria treated with hypotonic (0.5 X, 0.75 X), isotonic (1 X) and hypertonic (1.5 X, 2 X) solutions for 6 h, respectively. (D) Growth curves (OD 600) of the bacteria in the hypotonic (0.5 X and 0.75 X), isotonic (1 X) and hypertonic (1.5 X and 2 X) solutions. All the statistical data were presented as Mean  $\pm$  SD from at least three independent experiments for each specific condition. Statistical analyses based on one-way ANOVA were used in the experiments and \*, \*\*, \*\*\* and \*\*\*\* denoted  $P < 0.05$ ,  $P < 0.01$ ,  $P < 0.001$  and  $P < 0.0001$ , respectively. Scale bar: 100  $\mu$ m.



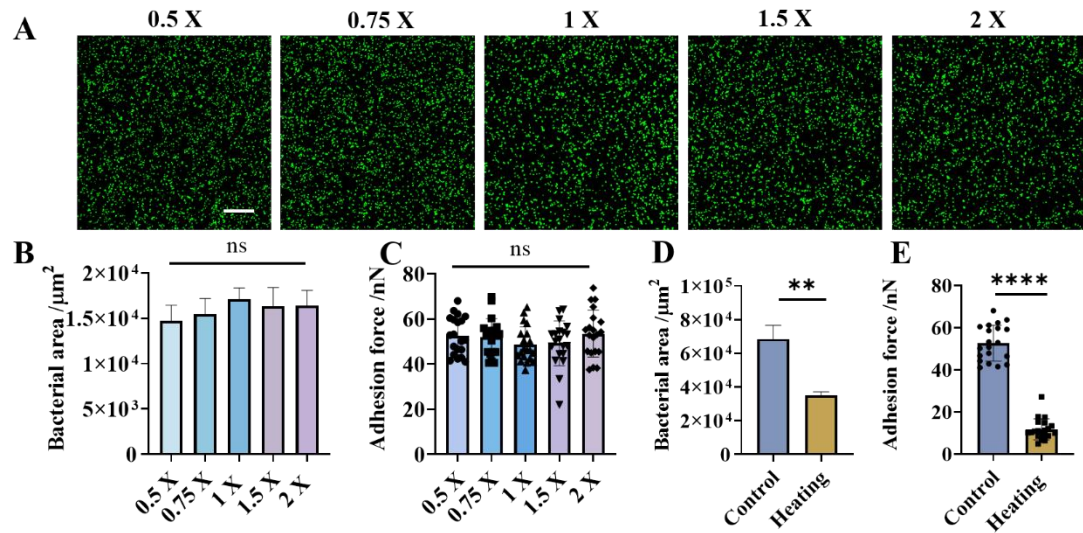

**Fig. S6.** Experimental results of bacterial adhesion to collagen-modified substrates under different osmotic pressures. In these experiments, bacteria (*S. aureus*) were added to collagen-modified substrates and then treated with the hypotonic (0.5 X and 0.75 X), isotonic (1 X) and hypertonic (1.5 X and 2 X) solutions for 6 h, respectively. Subsequently, they were rinsed three times to remove the nonadherent bacteria and imaged with an inverted confocal laser scanning microscope (Nikon A1, Japan). (A) Typical Fluorescence images of bacterial adhesion to collagen-modified substrates under different osmotic pressures. (B) Bacterial adhesion areas under different osmotic pressures. (C) Adhesion forces between the bacteria and the underlying collagen-modified substrates under different osmotic pressures. (D) Comparison of bacterial adhesion area between unheated and heated treatments. (E) Comparison of adhesion force between unheated and heated treatments. All these statistical results were presented as Mean  $\pm$  SD from at least three independent experiments for each specific condition. Statistical analyses based on one-way ANOVA were utilized in the experiments and \*, \*\*, \*\*\* and \*\*\*\* denoted  $P < 0.05$ ,  $P < 0.01$ ,  $P < 0.001$  and  $P < 0.0001$ , respectively. Scale bar 100  $\mu\text{m}$ .



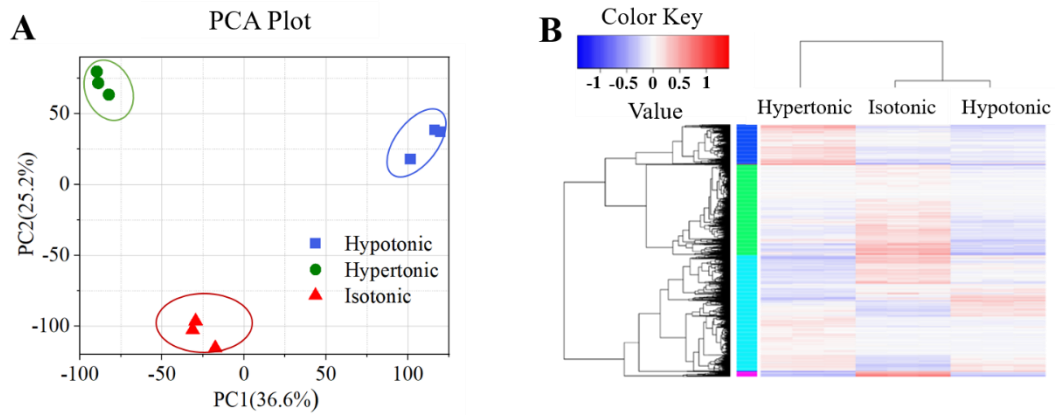

**Fig. S7.** RNA sequencing analysis were performed on host cells (IEC-6) treated with the hypotonic (0.5 X), isotonic (1 X) and hypertonic (2 X) solutions, respectively. (A) Principal component analysis (PCA) results of the RNA sequencing data. (B) Cluster gram heat map. These data demonstrated that there were significantly up-regulated/down-regulated genes in the host cells under different osmotic pressures.

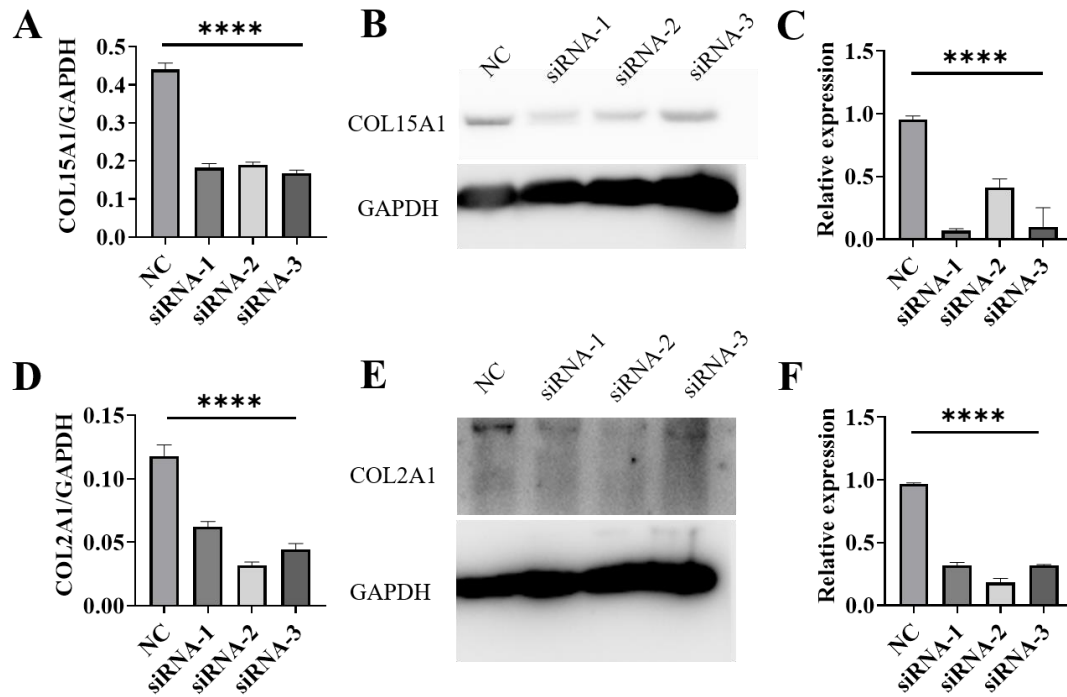

**Fig. S8.** Experiments on siRNA-mediated Knockdown of type XV and type II collagen in IEC-6 cells. (A) Relative expression of COL15A1 in the mRNA level. (B) Western blot (WB) and (C) the corresponding quantitative results for IEC-6 cells that were transfected with the designed siRNA sequences targeting COL15A1 or negative control (NC) siRNA. (D) Relative expression of COL2A1 in the mRNA level. (B) Western blot (WB) and (C) the corresponding quantitative results for IEC-6 cells that were transfected with the designed siRNA sequences targeting COL2A1 or negative control (NC) siRNA. All the statistical data were presented as Mean $\pm$ SD from at least three independent experiments for each specific condition. Statistical analyses based upon one-way ANOVA were used in the experiments, and \*, \*\*, \*\*\* and \*\*\*\* indicated  $P < 0.05$ ,  $P < 0.01$ ,  $P < 0.001$  and  $P < 0.0001$ , respectively.

**Table S1.** Preparation of osmotic stimulation solutions with different osmotic pressures.

| Experimental group | Reagent formula                                                   | Measured osmotic pressure (mOsm kg <sup>-1</sup> ) |
|--------------------|-------------------------------------------------------------------|----------------------------------------------------|
| 0.5 X              | Regular DMEM Medium <sup>[a]</sup> + ddH <sub>2</sub> O (v/v=1:1) | 168                                                |
| 0.75 X             | Regular DMEM Medium + ddH <sub>2</sub> O (v/v=2:1)                | 227                                                |
| 1 X                | Regular DMEM Medium                                               | 344                                                |
| 1.5 X              | Regular DMEM Medium + 30mg/ml mannitol                            | 499                                                |
| 2 X                | Regular DMEM Medium + 50mg/ml mannitol                            | 612                                                |

<sup>[a]</sup> DMEM/High glucose produced by Hyclone (Cat No.: SH30243.01) was referred to as isotonic solution (1 X) in the experiments.

**Table S2.** The number of significantly up-regulated and down-regulated genes in IEC-6 cells under hypertonic and hypotonic conditions

| Sample comparison       | Up-regulated | Down-regulated |
|-------------------------|--------------|----------------|
| Hypotonic vs. Isotonic  | 2399         | 667            |
| Hypertonic vs. Isotonic | 2113         | 566            |

**Table S3.** List of primer sequences designed for quantitative reverse transcription PCR.

| Target Gene |                | Sequence(5'—3')        |
|-------------|----------------|------------------------|
| COL15A1     | Forward primer | GCCCCCTACTTCATCCTCTC   |
|             | Reverse primer | CAGTACGGACCTCCAGGGTA   |
| COL2A1      | Forward primer | ACGCTCAAGTCGCTGAACAA   |
|             | Reverse primer | TCAATCCAGTAGTCTCCGCTCT |
| GAPDH       | Forward primer | CCGCATCTTCTTGTGCAGTG   |
|             | Reverse primer | CGATACGGCCAAATCCGTTC   |

**Table S4.** List of siRNA sequences designed in the experiments.

| Species           | Target Gene      | Name |           | Sequence(5'—3')                |
|-------------------|------------------|------|-----------|--------------------------------|
| Rattus norvegicus | COL15A1          | Si-1 | sense     | GCU CAU UGG UGU CCC<br>AUU ATT |
|                   |                  |      | antisense | UAA UGG GAC ACC AAU<br>GAG CTT |
|                   |                  | Si-2 | sense     | GGA AGU AGA CAU GCU<br>GGA UTT |
|                   |                  |      | antisense | AUC CAG CAU GUC UAC<br>UUC CTT |
|                   |                  | Si-3 | sense     | GCC UAA AGA AGC ACA<br>CGU UTT |
|                   |                  |      | antisense | AAC GUG UGC UUC UUU<br>AGG CTT |
|                   | COL2A1           | Si-1 | sense     | GCU GGU GCA CAA GGU<br>CCU ATT |
|                   |                  |      | antisense | GCU GGU GCA CAA GGU<br>CCU ATT |
|                   |                  | Si-2 | sense     | UAG GAC CUU GUG CAC<br>CAG CTT |
|                   |                  |      | antisense | GCU CAU CCA GGG CUC<br>CAA UTT |
|                   |                  | Si-3 | sense     | GGG UGA AGG UGG AAA<br>GCA ATT |
|                   |                  |      | antisense | UUG CUU UCC ACC UUC<br>ACC CTT |
|                   | Negative control |      | sense     | UUC UCC GAA CGU GUC<br>ACG UTT |
|                   |                  |      | antisense | ACG UGA CAC GUU CGG<br>AGA ATT |
