# Supplementary material for: Bacterial-host adhesion dominated by collagen subtypes remodeled by osmotic pressures
Source: Research Square preprint supplement (doi:10.21203/rs.3.rs-4003372/v1), 2024-03-18
Supplement: Supplementary file 1 [file b25e4db227bcee5faf2384c9.xlsx]

## Sheet: Fig. 1D
Fig. 1D
	IEC-6: NadB
	0.5 X	1 X	2 X
	116	27	48
	118	35	47
	112	31	69
	86	27	96
	82	32	55
	97	36	75

## Sheet: Fig. 1E
Fig. 1E
	IEC-6: NadC
	0.5 X	1 X	2 X
	78	20	49
	68	20	64
	61	24	89
	76	25	60
	58	23	55
	64	22	76

## Sheet: Fig. 1F
Fig. 1F
	IEC-6: NadB Fold
	0.5 X vs.1 X	2 X vs.1 X
	3.25	2.07447

## Sheet: Fig. 1G
Fig. 1G
	IEC-6: NadC Fold
	0.5 X vs. 1 X	2 X vs. 1 X
	3.02239	2.93284

## Sheet: Fig. 1H
Fig. 1H
	IEC-6: NadC (%)
	0.5 X	1 X	2 X
	17.5	10.2	15.7
	18.3	10.27	17.02
	20.37	10.58	15.4

## Sheet: Fig. 1J
Fig. 1J
	HaCat: NadB
	0.5 X	1 X	2 X
	31	8	18
	38	1	10
	35	3	20
	30	12	19
	28	5	15
	28	10	18

## Sheet: Fig. 1K
Fig. 1K
	HaCat: NadC
	0.5 X	1 X	2 X
	19	1	10
	19	1	14
	22	5	9
	26	3	13
	16	3	11
	26	5	15

## Sheet: Fig. 1L
Fig. 1L
	HaCat: NadB Fold
	0.5 X vs.1 X	2 X vs.1 X
	4.87179	2.5641

## Sheet: Fig. 1M
Fig. 1M
	HaCat: NadC Fold
	0.5 X vs.1 X	2 X vs.1 X
	7.11111	4

## Sheet: Fig. 1N
Fig. 1N
	HaCat: NadC (%)
	0.5 X	1 X	2 X
	8.87	2.81	4.1
	9.07	2.84	3.8
	8.73	2.54	3.84

[truncated: 33 more sheets: Fig.2B, Fig. 2D, Fig. 2F, Fig. 2G, Fig. 2H, Fig. 3B, Fig. 3C, Fig. 3D, Fig .3G, Fig. 3H, Fig. 3I, Fig. 3J, Fig. 4C, Fig. 4D, Fig. 4G, Fig. 4H, Fig. 5A, Fig. 5C, Fig. 5D, Fig. S1B …]
